# Supplementary material
Source: publisher site journal article supplement (https://www.dovepress.com/article/547594)
Supplement: Supplementary file 1 [file 547594%20Supplementary%20materials.docx]

**Supplementary Materials**

**Table S1. Findings of multi-modal imaging and other diagnostic tests in a small proportion of MINOCA patients.**

| Multi-modal tests | Number of cases |
| --- | --- |
| Participants with OCT interpretable | N=126 |
| OCT culprit lesion | Plaque rupture: 50 (39.6%)  Plaque erosion: 38 (30.1%)  Calcified nodules: 4 (3.1%)  SCAD: 1 (0.7%)  Spasm: 2 (1.5%) |
| No OCT culprit lesion | 31 (24.6%) |
| Participants with CMR findings | N=87 |
| CMR normal | 24 (27.6%) |
| CMR abnormal | Infarct-pattern LGE: 39 (44.8%)  Regional injury without LGE: 21 (24.1%)  Non-ischemic: 3 (3.4%) |
| IMR conducted  IMR normal (<25U)  IMR abnormal (>25U) | N=15  13 (86.7%)  2 (13.3%) |
| Left ventricular angiography  Normal  Abnormal | N=62  58 (93.5%)  4 (6.5%) |

A small proportion of patients in our cohort underwent coronary optical coherence tomography (OCT) with interpretable images and cardiac magnetic resonance (CMR) beyond angiography to explore the underlying causes of MINOCA since OCT/CMR tests were not routinely performed in daily practice. A definite or possible culprit lesion was identified in 95 (75.4%) of 126 patients undergoing OCT. The most common OCT culprit lesions were plaque rupture and erosion, which represent atherosclerotic plaque disruption. In addition, 4 patients had calcified nodule, 2 had intimal bumping suggesting coronary artery spasm, and 1 had spontaneous coronary artery dissection (SCAD). CMR was performed a median of 5 days from MI onset. T2-weighted imaging was completed in 84 patients, and T1 mapping was completed in 72. The infarction-pattern of late gadolinium enhancement (LGE) was identified in 39 patients (44.8%). Regional injury (e.g., increased T2-weighted signal) was observed in 21 patients (20.7%). Additionally, 3 had nonischemic findings and the remaining 24 (27.6%) had normal CMR. Index of microcirculatory resistance (IMR) was measured in 15 patients with suspicious microvascular dysfunction, and 13 of them (86.7%) had normal IMR. Left ventricular abnormality was identified in 4 (6.5%) of 62 patients undergoing ventriculography.

**Table S2. Baseline characteristics in patients stratified by baseline hs-CRP levels.**

| Variable | All patients  (n=1062) | hs-CRP <2mg/L  (n=521) | hs-CRP ≥2mg/L  (n=541) | p value |
| --- | --- | --- | --- | --- |
| Male, n(%) | 786 (74.0%) | 388 (74.4%) | 398 (73.5%) | 0.737 |
| Age, years | 55.7±11.8 | 55.6±11.5 | 55.7±12.0 | 0.459 |
| BMI, kg/m2 | 25.4±3.7 | 25.3±3.4 | 25.6±4.0 | 0.048 |
| STEMI, n(%) | 428 (40.3%) | 200 (38.3%) | 228 (42.1%) | 0.212 |
| Emergent angiography, n(%) | 145 (13.6%) | 64 (12.2%) | 81 (14.9%) | 0.202 |
| Past history |  |  |  |  |
| Hypertension | 566 (53.2%) | 276 (52.9%) | 290 (53.6%) | 0.837 |
| Diabetes | 166 (15.6%) | 87 (16.6%) | 79 (14.6%) | 0.347 |
| Dyslipidemia | 634 (59.6%) | 318 (61.0%) | 316 (58.4%) | 0.383 |
| Previous MI | 56 (5.2%) | 29 (5.5%) | 27 (4.9%) | 0.675 |
| LVEF, % | 60.5±7.5 | 61.6±5.7 | 59.7±8.4 | 0.149 |
| Laboratory test |  |  |  |  |
| hs-CRP, mg/L | 2.20 (1.03, 5.75) | 0.97 (0.57, 1.43) | 5.35 (3.08, 9.83) | <0.001 |
| FBG, mmol/L | 5.69±1.68 | 5.67±1.59 | 5.73±1.79 | 0.114 |
| TG, mmol/L | 1.44 (1.05, 2.00) | 1.39 (1.03, 1.94) | 1.50 (1.10, 2.05) | 0.046 |
| CHOL, mmol/L | 3.92±0.91 | 3.83±0.87 | 4.00±0.93 | 0.540 |
| LDL-C, mmol/L | 2.29±0.76 | 2.17±0.71 | 2.39±0.78 | 0.129 |
| HDL-C, mmol/L | 1.08±0.29 | 1.14±0.30 | 1.03±0.26 | 0.001 |
| NT-proBNP, pg/mL | 372 (112, 683) | 366 (109, 685) | 374 (123, 679) | 0.132 |
| Peak TnI, ng/mL | 3.24 (0.72, 6.51) | 3.19 (0.64, 6.45) | 3.28 (0.83, 6.73) | 0.125 |
| Medication at discharge |  |  |  |  |
| DAPT | 977 (91.9%) | 484 (92.8%) | 493 (91.1%) | 0.288 |
| Statin | 1016 (95.6%) | 494 (94.8%) | 522 (96.4%) | 0.181 |
| ACEI/ARB | 681 (64.1%) | 348 (66.7%) | 333 (61.5%) | 0.075 |
| Beta-blocker | 774 (72.8%) | 369 (70.8%) | 405 (74.8%) | 0.052 |

Patients were stratified as residual inflammatory risk (RIR) group (hs-CRP ≥2mg/L) and non-RIR group (hs-CRP <2mg/L). BMI: body mass index, STEMI: ST-segment elevation myocardial infarction, LVEF: left ventricular ejection fraction, hs-CRP: high sensitive C-reactive protein, FBG: fasting blood glucose, TG: triglyceride, CHOL: total cholesterol, LDL-C: [low-density lipoprotein cholesterol](http://www.baidu.com/link?url=SncXbPujPJ1TQK58vJCi8AihGGz5XCKgYVTs9DUwcLB3fh7apbN-nKhsLXpoKZ9D6OyZgeZlXUu2VxwFCFZAKYLs8XCwFGLR02fbc3aw8UdWtMQ-SXDbxEld46UoQFbckidHtMi7kK5BNy7w3rWh0a" \t "https://www.baidu.com/_blank), HDL-C: high-density lipoprotein cholesterol, NT-proBNP: N-terminal pro-B-type natriuretic peptide, TnI: Troponin I, DAPT: dual anti-platelet therapy, ACEI: angiotensin-converting enzyme inhibitor, ARB: angiotensin receptor blocker.

**Table S3. Clinical outcomes in patients stratified by baseline hs-CRP levels.**

| CV outcomes | All patients  (n=1062) | hs-CRP <2mg/L  (n=521) | hs-CRP ≥2mg/L  (n=541) | p value |
| --- | --- | --- | --- | --- |
| MACE | 162 (15.2%) | 57 (10.9%) | 105 (19.4%) | <0.001 |
| Death, nonfatal MI, stroke  or revascularization | 100 (9.4%) | 34 (6.5%) | 66 (12.2%) | 0.002 |
| Death, nonfatal MI, or stroke | 70 (6.5%) | 22 (4.2%) | 48 (8.8%) | 0.003 |
| All-cause death | 18 (1.6%) | 3 (0.5%) | 15 (2.7%) | 0.011 |
| Nonfatal MI | 40 (3.7%) | 15 (2.8%) | 25 (4.6%) | 0.136 |
| Revascularization | 44 (4.1%) | 16 (3.1%) | 28 (4.6%) | 0.085 |
| Nonfatal stroke | 12 (1.1%) | 4 (0.7%) | 8 (1.4%) | 0.273 |
| Hospitalization for UA | 66 (6.2%) | 28 (5.3%) | 38 (7.0%) | 0.266 |
| Hospitalization for HF | 45 (4.2%) | 14 (2.6%) | 31 (5.7%) | 0.021 |

MACE: major adverse cardiovascular event, MI: myocardial infarction, UA: unstable angina, HF: heart failure.

**Table S4. Impact of elevated hs-CRP on the composite hard and soft components of MACE using a sequential approach.**

| hs-CRP ≥2mg/L vs. <2mg/L | Crude Cox model | | Adjusted Cox model | |
| --- | --- | --- | --- | --- |
| HR (95% CI) | P value | HR (95% CI) | P value |
| Hard endpoint 1 (Death, MI, or stroke) | 2.01 (1.22-3.30) | 0.005 | 1.94 (1.18-3.18) | 0.008 |
| Hard endpoint 2 (Death, MI, or stroke or revascularization) | 1.76 (1.17-2.64) | 0.006 | 1.72 (1.14-2.58) | 0.009 |
| Soft endpoint (UA/HF hospitalization) | 1.94 (1.18-3.18) | 0.009 | 1.73 (1.19-2.53) | 0.004 |
| MACE | 1.79 (1.30-2.46) | <0.001 | 1.77 (1.29-2.43) | <0.001 |

A hierarchical approach based on Cox analysis was used to evaluate the robustness of the composite endpoint. We first tested hard endpoints and found that the associations of residual inflammation (hs-CRP≥2mg/L) with the composite hard endpoints (death, MI or stroke, with or without revascularization) were significant. Then, the composite soft endpoint (hospitalization for UA or HF) was tested and the associations were also significant. The primary endpoint of MACE remained significant when both hard and soft endpoints were combined. Hence, the analyses of hard and soft components were consistent with the primary analysis of MACE, and the hard endpoint could primarily drive the significant effect on MACE, indicting the robustness of primary result. HR was adjusted for age, sex, BMI, MI type, LVEF, hypertension, diabetes and dyslipidemia in the multivariable model.

**Table S5. Temporal changes in hs-CRP levels and CV outcomes.**

| A sub-cohort with hs-CRP at baseline and follow-up | Persistently low hs-CRP (n=256) | Increased hs-CRP (n=107) | Reduced hs-CRP (n=185) | Persistently high hs-CRP (n=244) | P value |
| --- | --- | --- | --- | --- | --- |
| Levels of hs-CRP |  |  |  |  |  |
| Baseline (1-3 months) | 1.06 (0.67, 1.47) | 1.04 (0.64, 1.65) | 4.49 (2.91, 9.30) | 5.19 (3.07, 9.63) | <0.001 |
| Follow-up (6-12 months) | 1.01 (0.63, 1.39) | 2.84 (2.12, 4.32) | 1.47 (0.80, 1.97) | 4.57 (2.70, 8.47) | <0.001 |
| CV outcomes |  |  |  |  |  |
| MACE | 25 (9.7%) | 18 (15.8%) | 24 (12.9%) | 54 (22.1%) | 0.001 |
| Death, MI, stroke or  revascularization | 13 (5.0%) | 12 (11.2%) | 14 (7.5%) | 31 (12.7%) | 0.017 |


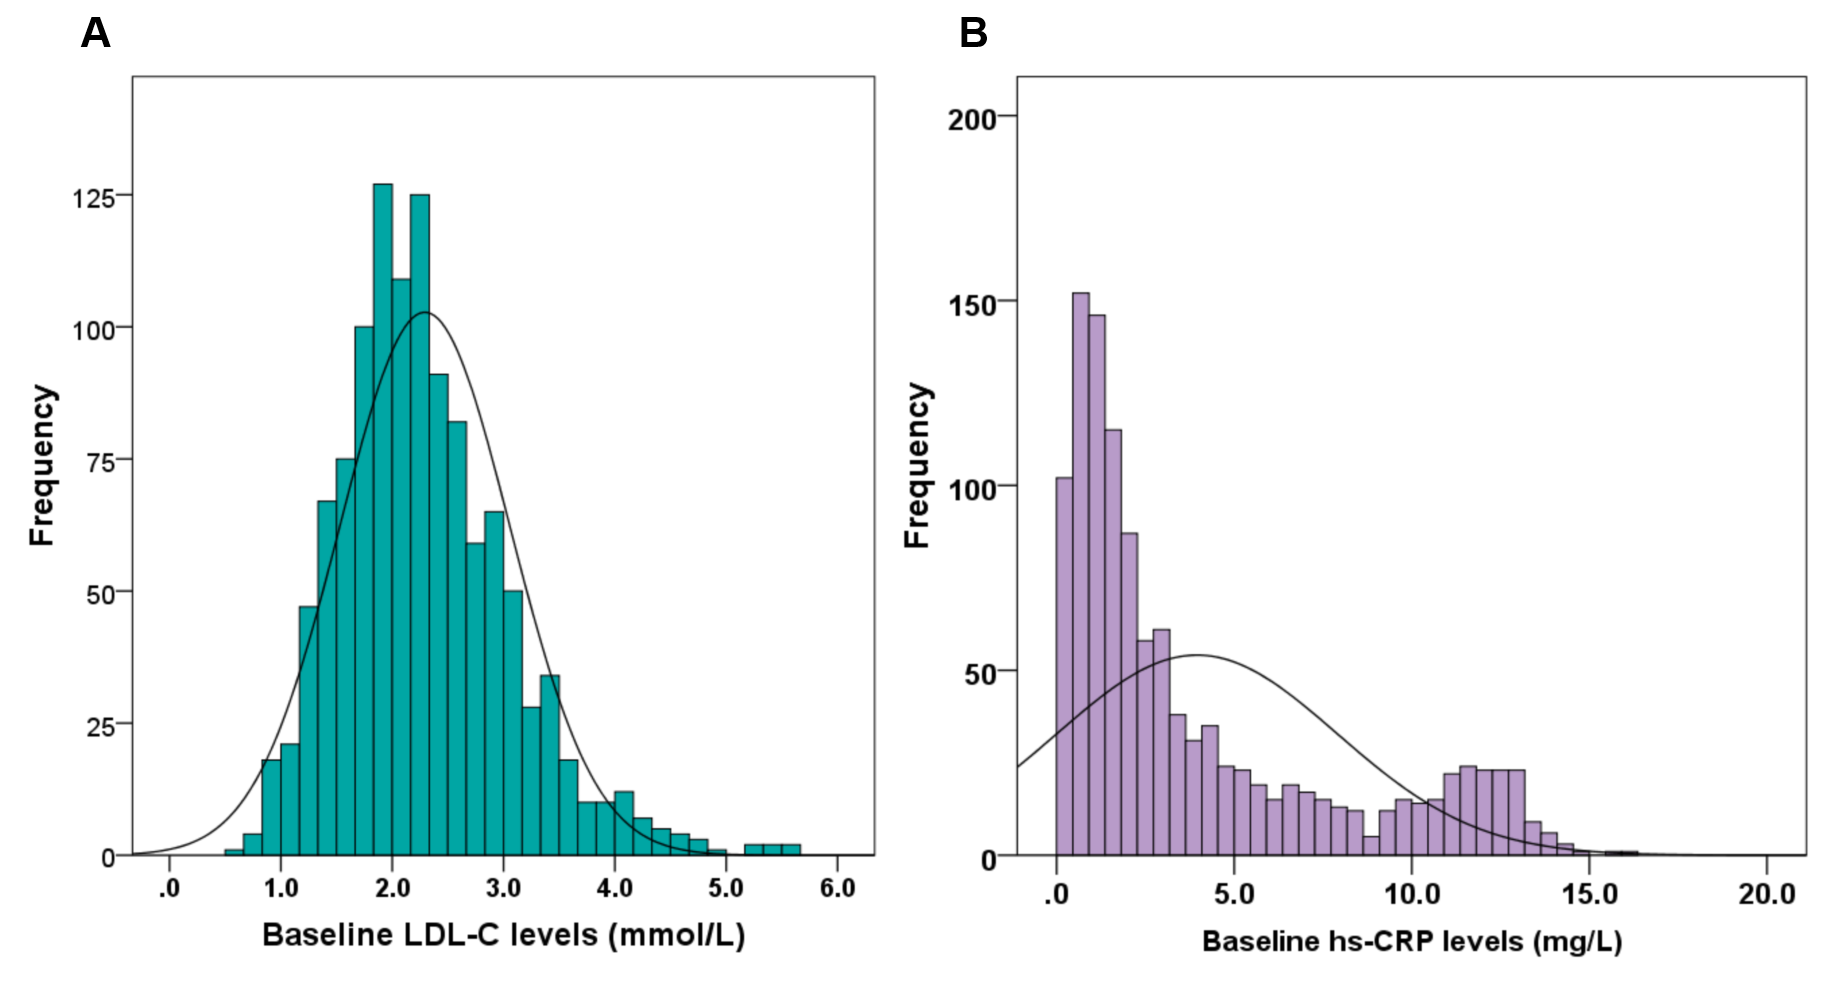


**Figure S1. Distribution of LDL-C and hs-CRP levels at baseline in all patients.**

Distribution of baseline LDL-C (A) and hs-CRP levels (B) in all patients (n=1062).

**
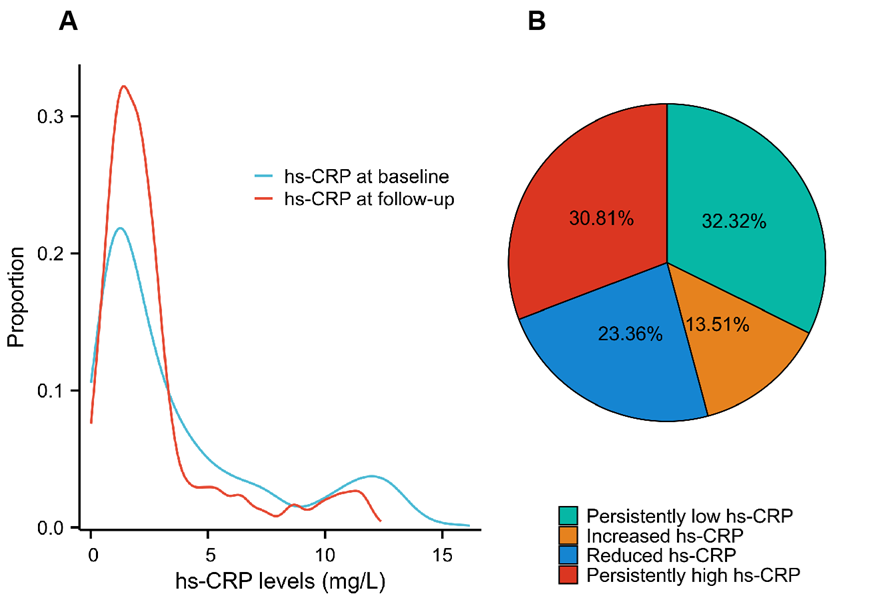
**

**Figure S2. Temporal changes in hs-CRP and relevant proportions.**

Distribution of hs-CRP levels at baseline (1-3 months) and at follow-up (6-12 months after MI) in a subset of cohort (n=792) (A) and proportions of the temporal changes in hs-CRP (B).


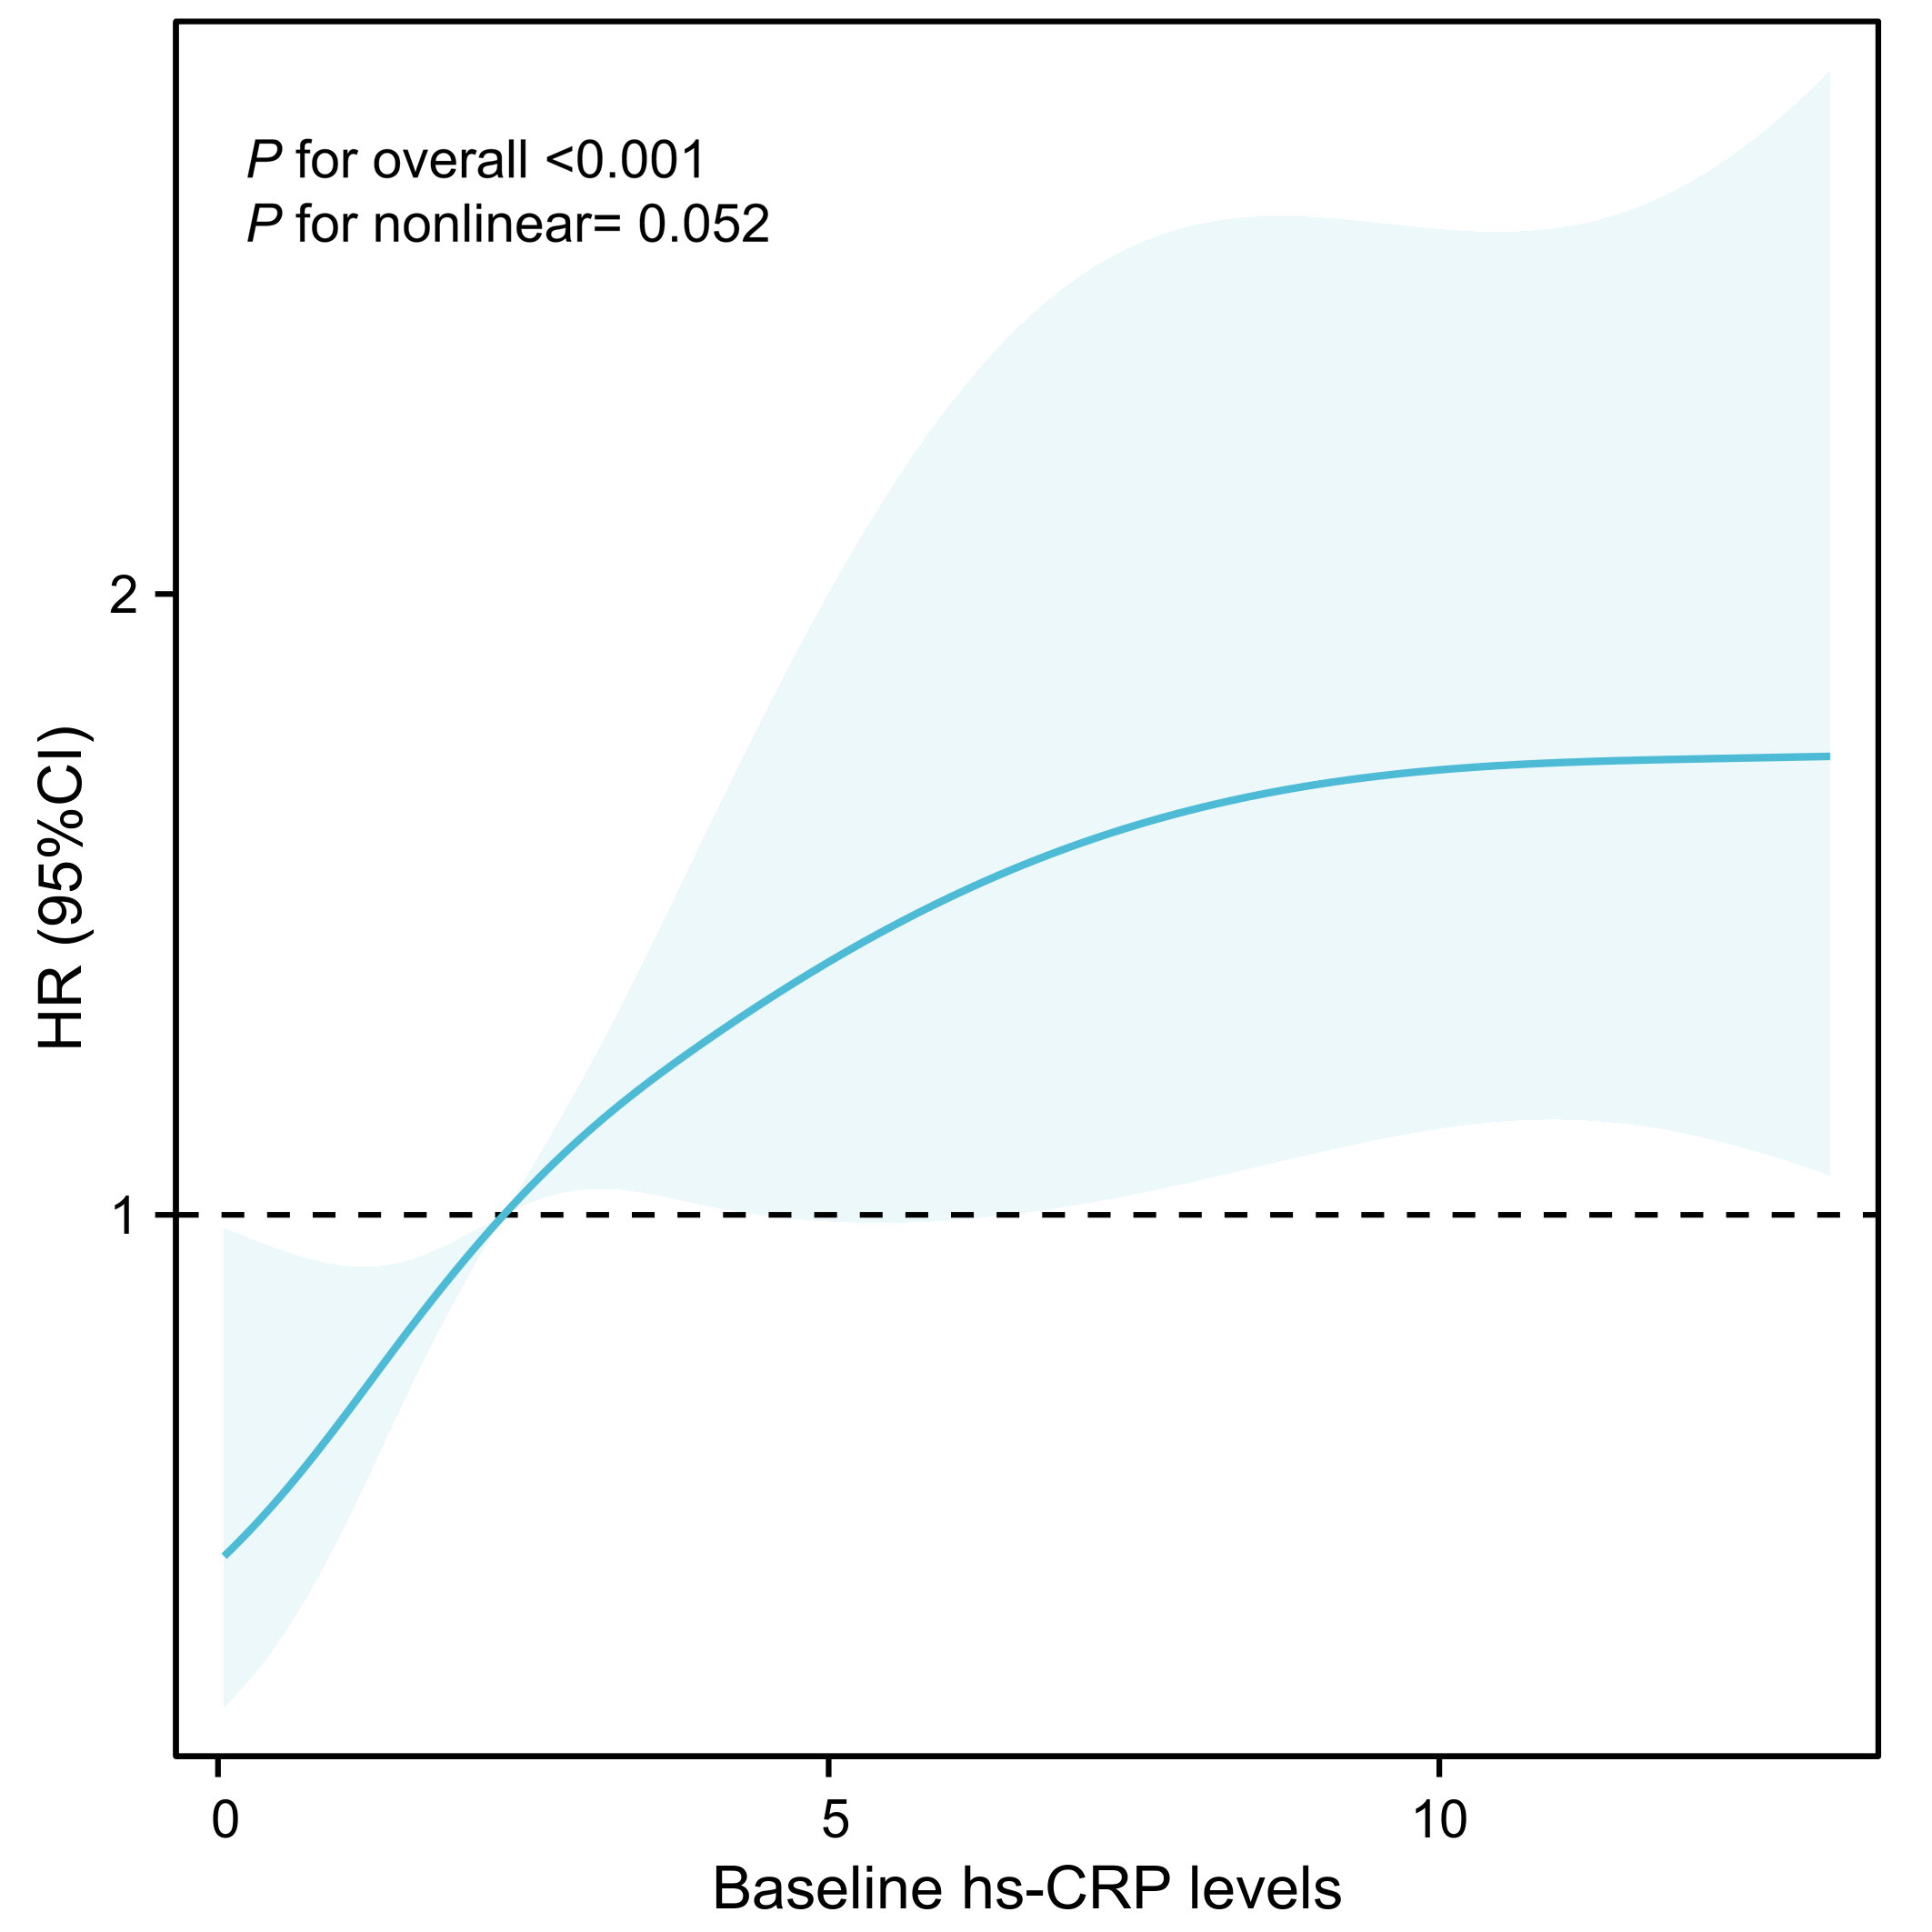


**Figure S3. Dose-response relationship between baseline hs-CRP and MACE risk.**

The near-linear relationship between baseline levels of hs-CRP and the risk of MACE analyzed by restricted cubic spline models. Solid line indicates HR and shadow shape indicates 95% CI. The reference value (HR=1) was set at the median level of hs-CRP and the four knots were set at the 5th, 35th, 65th, and 95th percentiles of hs-CRP.


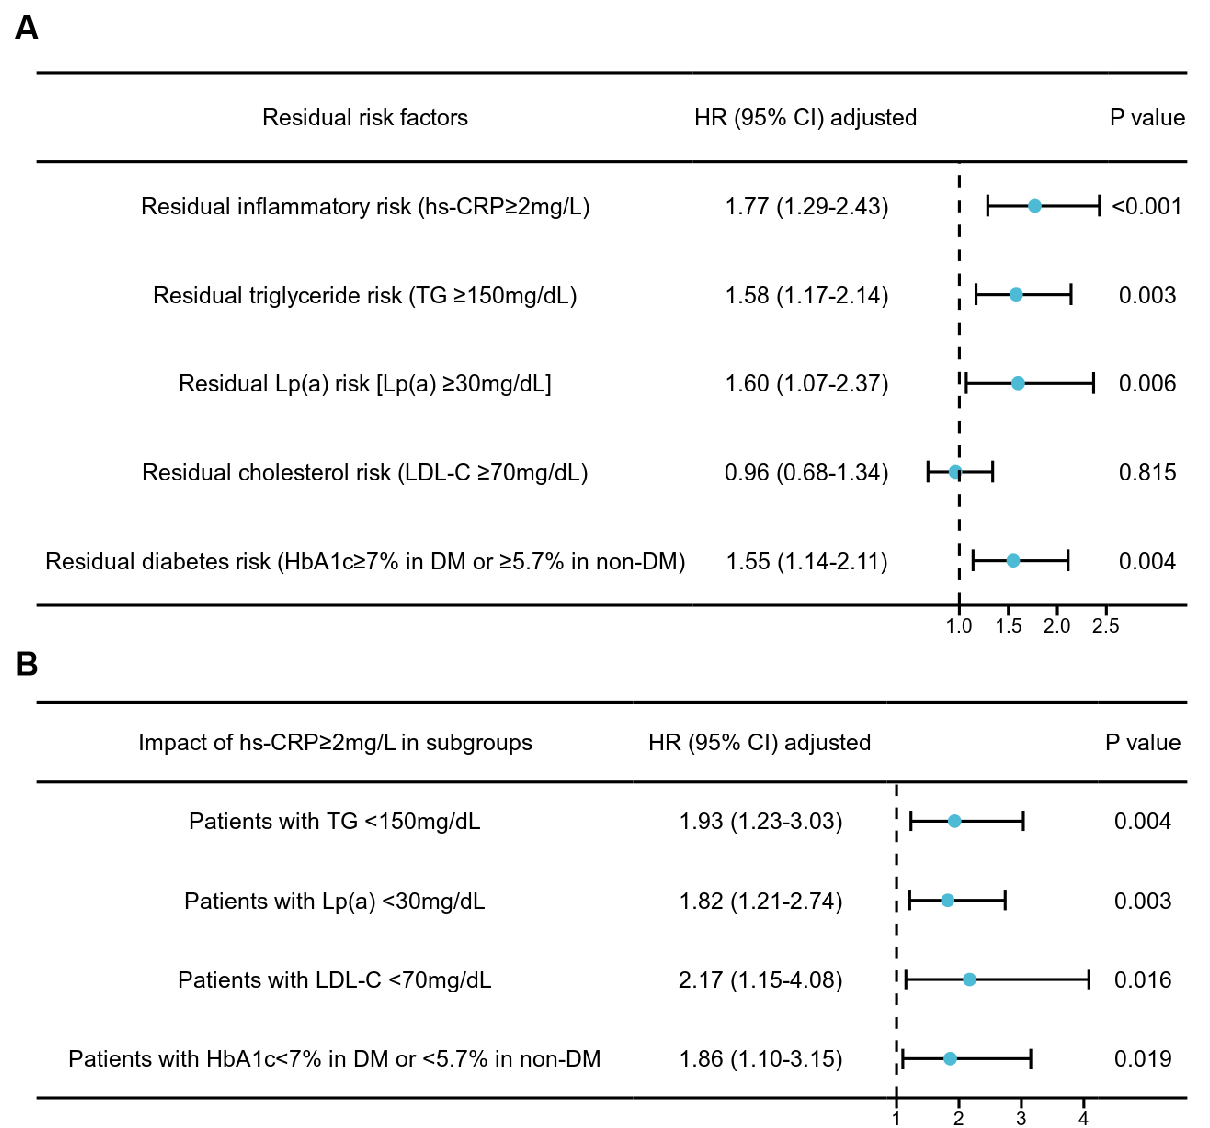


**Figure S4. Incremental prognostic value of residual inflammatory risk.**

Relationship between residual risk biomarkers and risk of MACE in all patients (A) and the impact of hs-CRP≥2mg/L on MACE risk in subsets of patients with the other residual risk factors below the target level (B). Residual inflammatory risk indicated hs-CRP≥2mg/L. Residual triglyceride risk indicated TG≥150mg/dL. Residual lipoprotein(a) risk indicated Lp(a)≥30mg/dL. Residual cholesterol risk indicated LDL-C≥70mg/dL. Residual diabetes risk indicated HbA1c ≥7% in diabetic patients or ≥5.7% in non-diabetic patients. The risk of MACE was analyzed by multivariate Cox regression analysis. The vertical dotted line indicated HR value of 1.
